# Supplementary material for: Development and Validation of a Method for Determining the Quercetin-3-O-glucuronide and Ellagic Acid Content of Common Evening Primrose (Oenothera biennis) by HPLC-UVD
Source: Molecules. 2021 Jan 7;26(2):267. doi: 10.3390/molecules26020267 (PMC7827709; doi:10.3390/molecules26020267)
Supplement: Supplementary file 1 [file molecules-26-00267-s001.pdf]

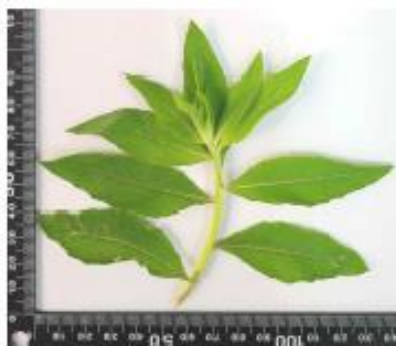

**a)**

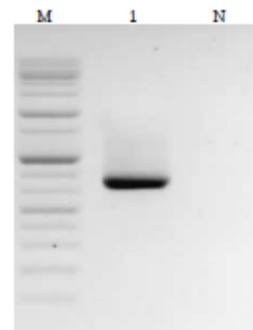

**b)**

**Supplementary Figure S1. a) Test article and b) PCR amplification of test article by ITS DNA analysis. M: 1Kb(+), 1: test article, N:negative control.**

**Supplementary Table S1. Putative identification of four major secondary metabolites in OBS-E using UHPLC-MS.**

| RT (min) | <i>m/z</i> | Ionized form          | Calculated formula                              | MS/MS ( <i>m/z</i> ) | $\Delta$ ppm | Identification          |
|----------|------------|-----------------------|-------------------------------------------------|----------------------|--------------|-------------------------|
| 1.95     | 169.0000   | ([M-H] <sup>-</sup> ) | C <sub>7</sub> H <sub>5</sub> O <sub>5</sub>    | 124                  | -1.594       | Gallic acid             |
| 6.68     | 301.0833   | ([M-H] <sup>-</sup> ) | C <sub>14</sub> H <sub>5</sub> O <sub>8</sub>   | 184,200,229,256,284  | -1.990       | Ellagic acid            |
| 6.94     | 479.0788   | ([M+H] <sup>+</sup> ) | C <sub>21</sub> H <sub>19</sub> O <sub>13</sub> | 303                  | -1.694       | Quercetin 3-glucuronide |
| 7.78     | 463.0841   | ([M+H] <sup>+</sup> ) | C <sub>21</sub> H <sub>19</sub> O <sub>12</sub> | 287                  | -1.656       | Luteolin 7-glucuronide  |

**Supplementary Table S2. Genetic identification of test article by ITS DNA analysis**

| Sample          | Gene bank No. (NCBI) | Identification           | Similarity     |
|-----------------|----------------------|--------------------------|----------------|
| Evenig primrose | MT610948.1           | <i>Oenothera biennis</i> | 704/704 (100%) |

## Supplementary results

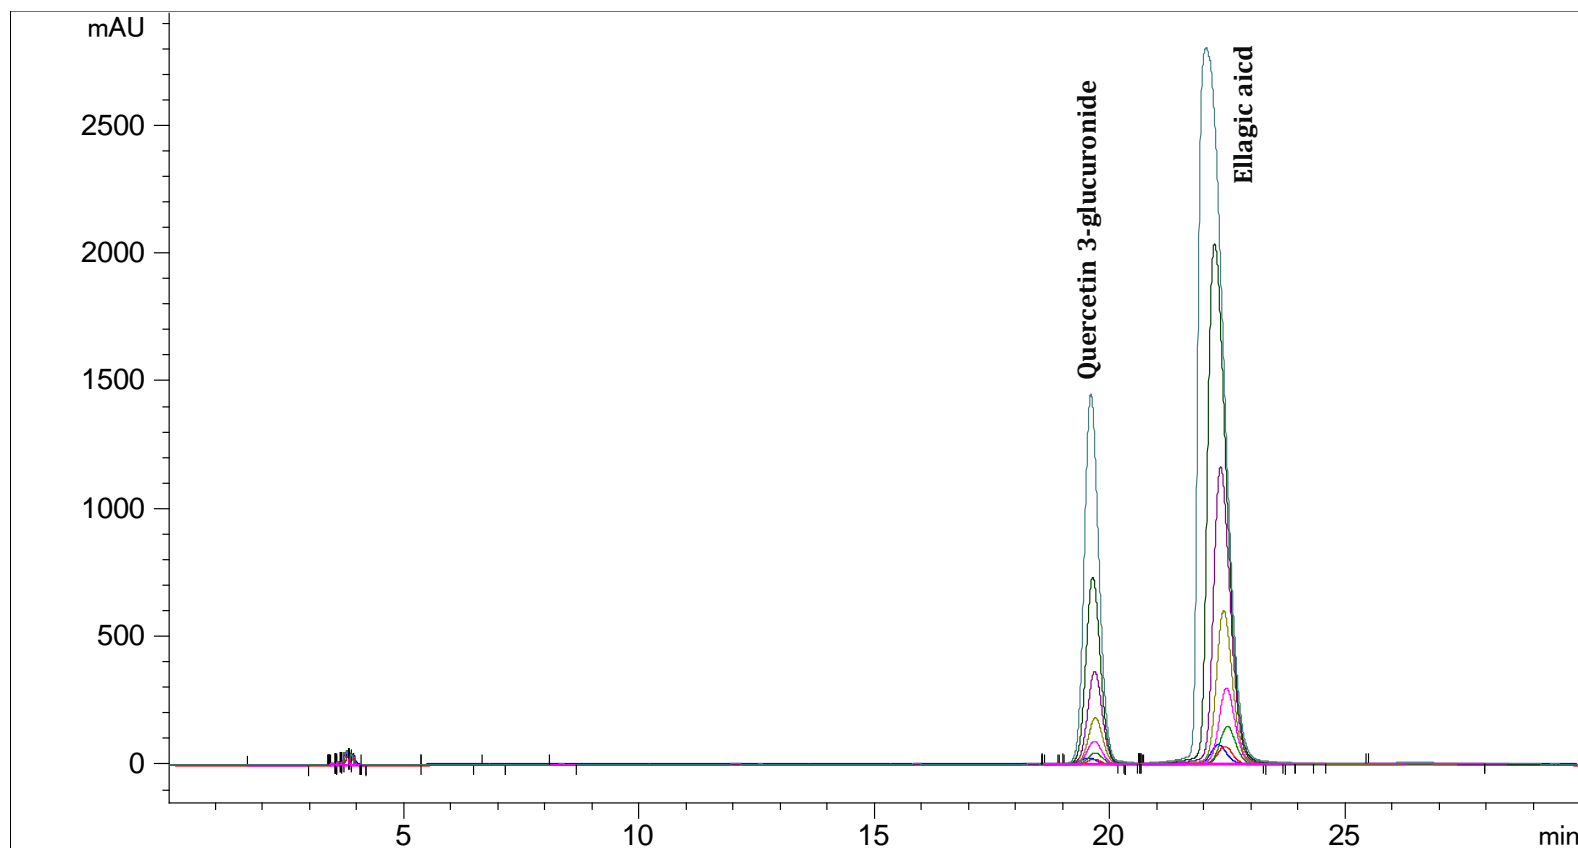

**Supplementary Figure S2. Overlaid chromatogram of standard mixture comprising quercetin-3-O-glucuronide and ellagic acid at various concentrations.** Quercetin-3-O-glucuronide: 14.625, 29.25, 58.5, 117, 234, and 468 µg/mL; Ellagic acid: 15, 30, 60, 120, 240, and 480 µg/mL.

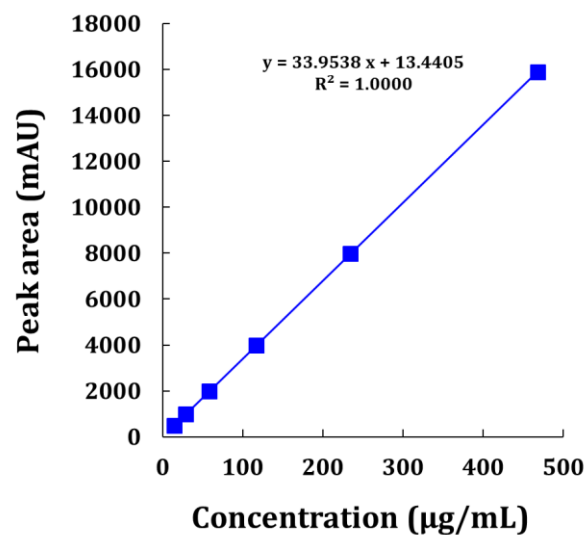

a)

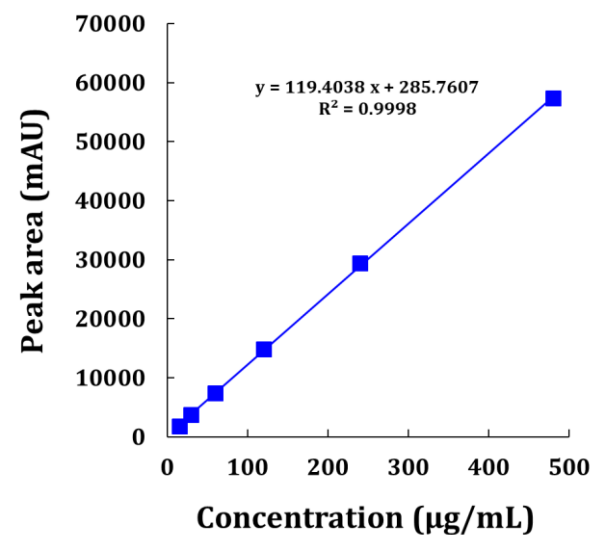

b)

**Supplementary Figure S3. Calibration curve of a) quercetin-3-O-glucuronide and b) ellagic acid.** Quercetin-3-O-glucuronide: 14.625, 29.25, 58.5, 117, 234, and 468 µg/mL; Ellagic acid: 15, 30, 60, 120, 240, and 480 µg/mL.
